# Supplementary figures and images for: Tobacco Smoke and Electronic Cigarette Vapor Alter Enhancer RNA Expression That Can Regulate the Pathogenesis of Lung Squamous Cell Carcinoma
Source: MDPI journal article supplement (doi:10.3390/cancers13164225), 2021-08-23

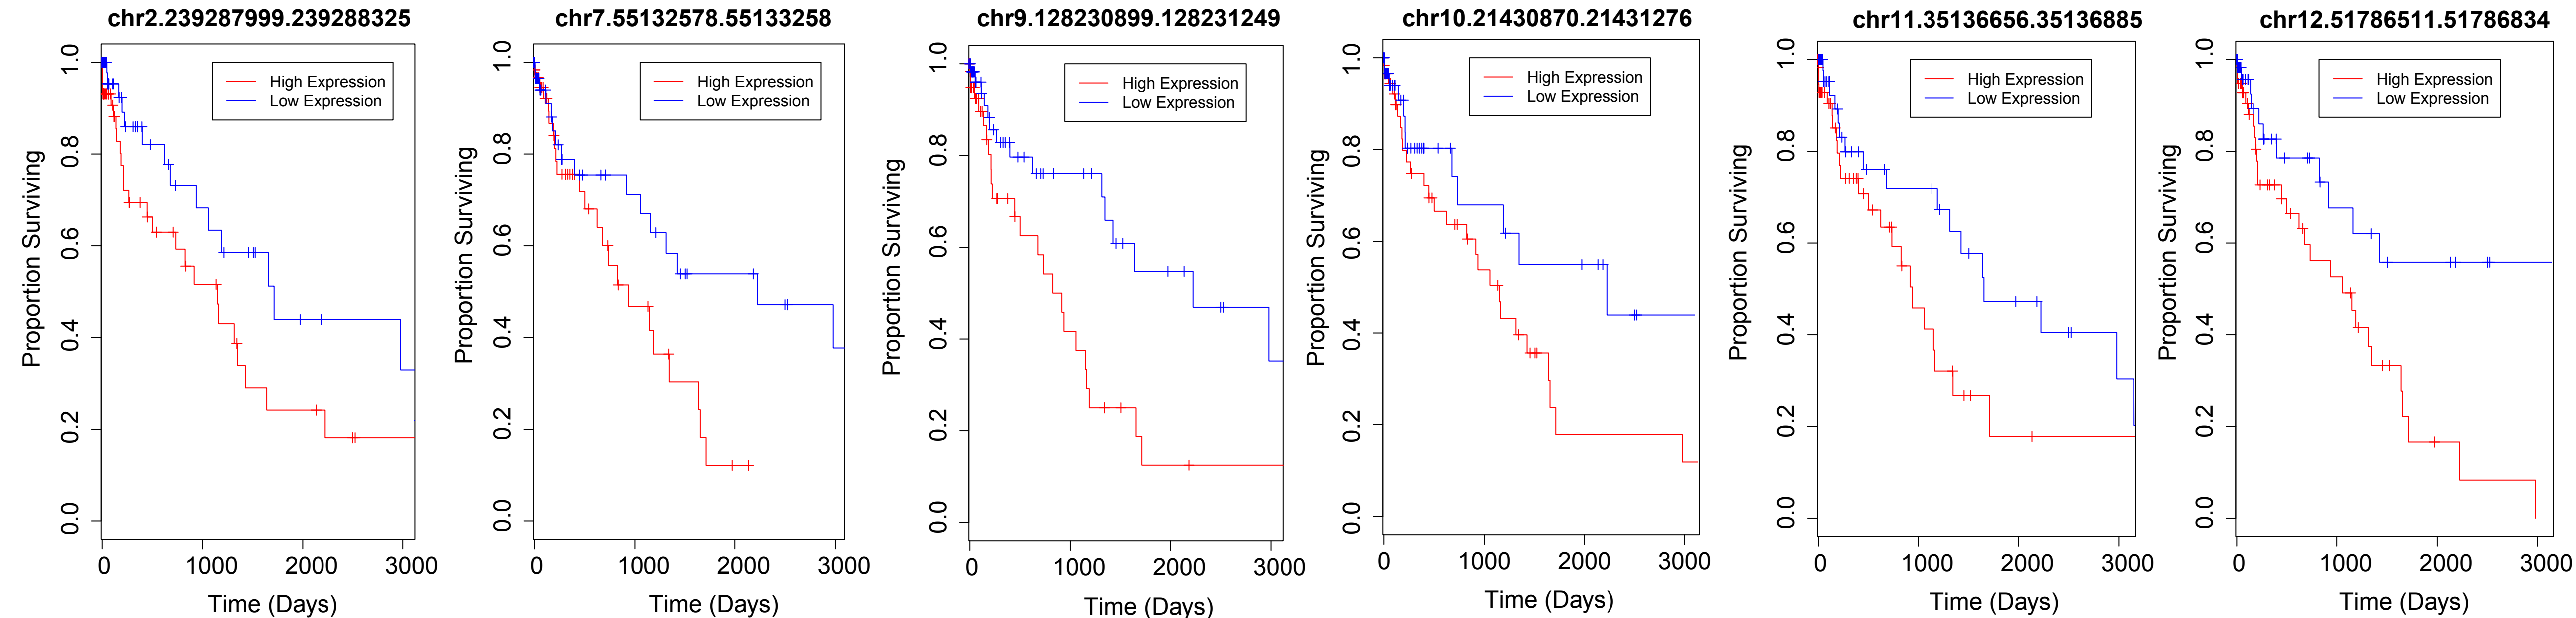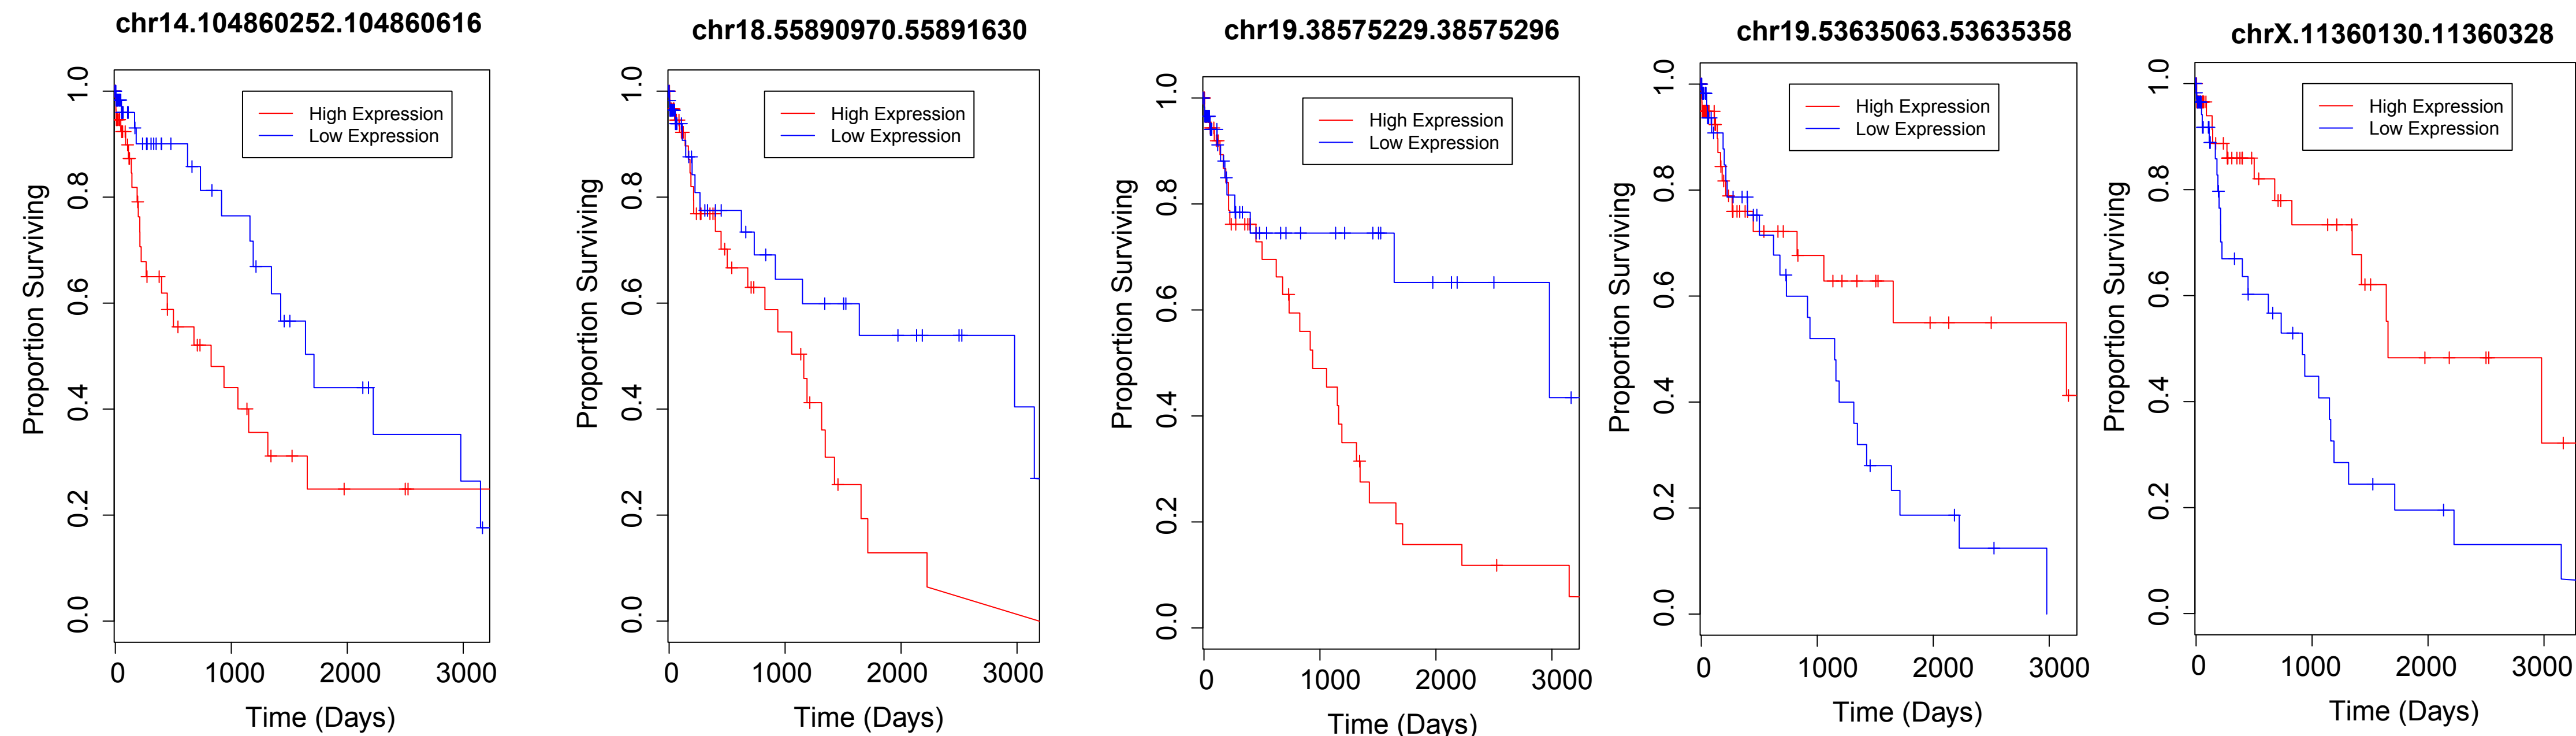

Supplement: s1 [file s1]

A

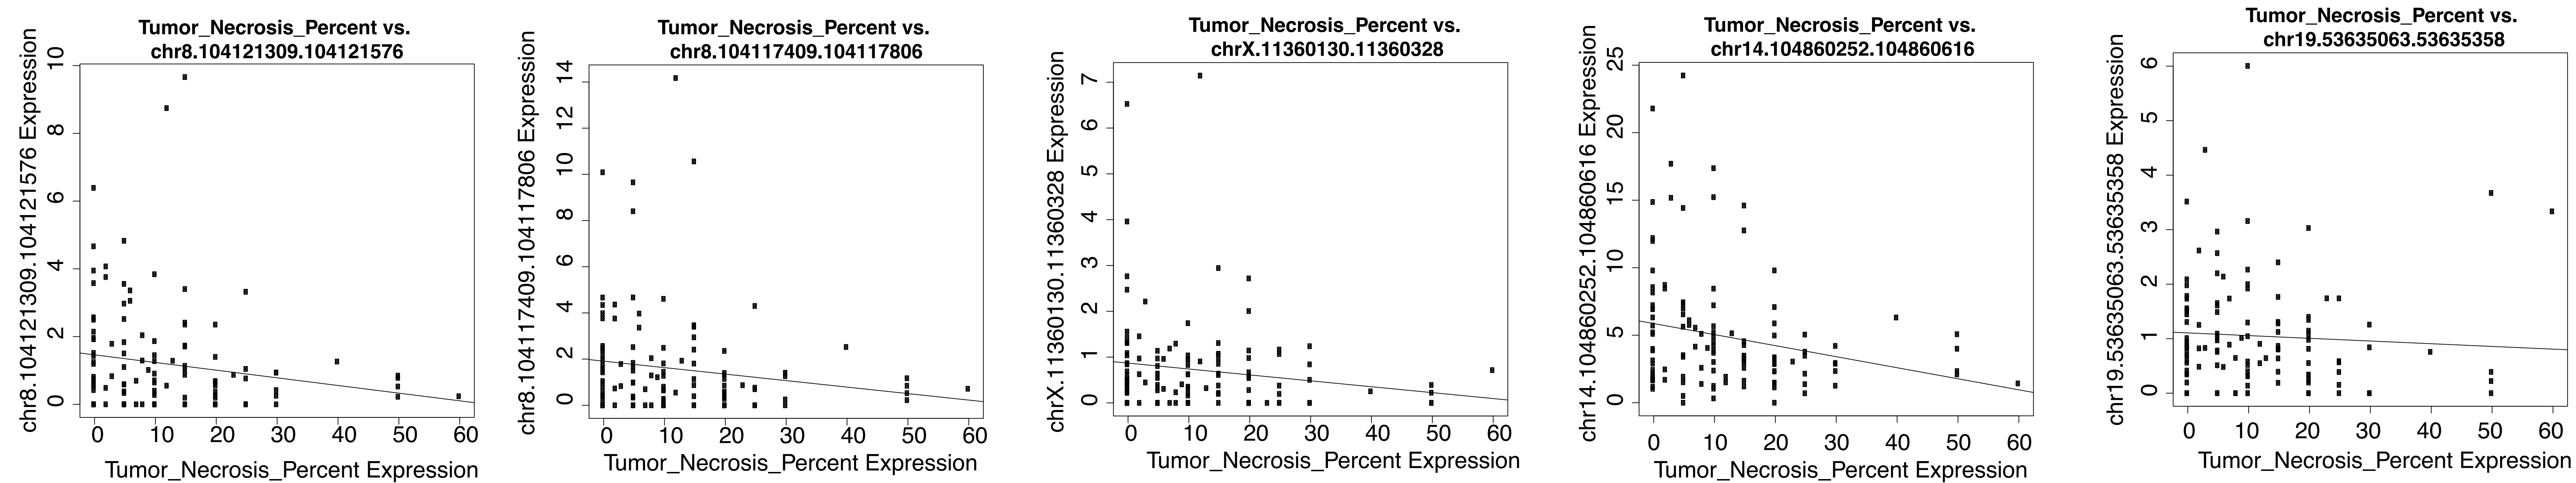

B

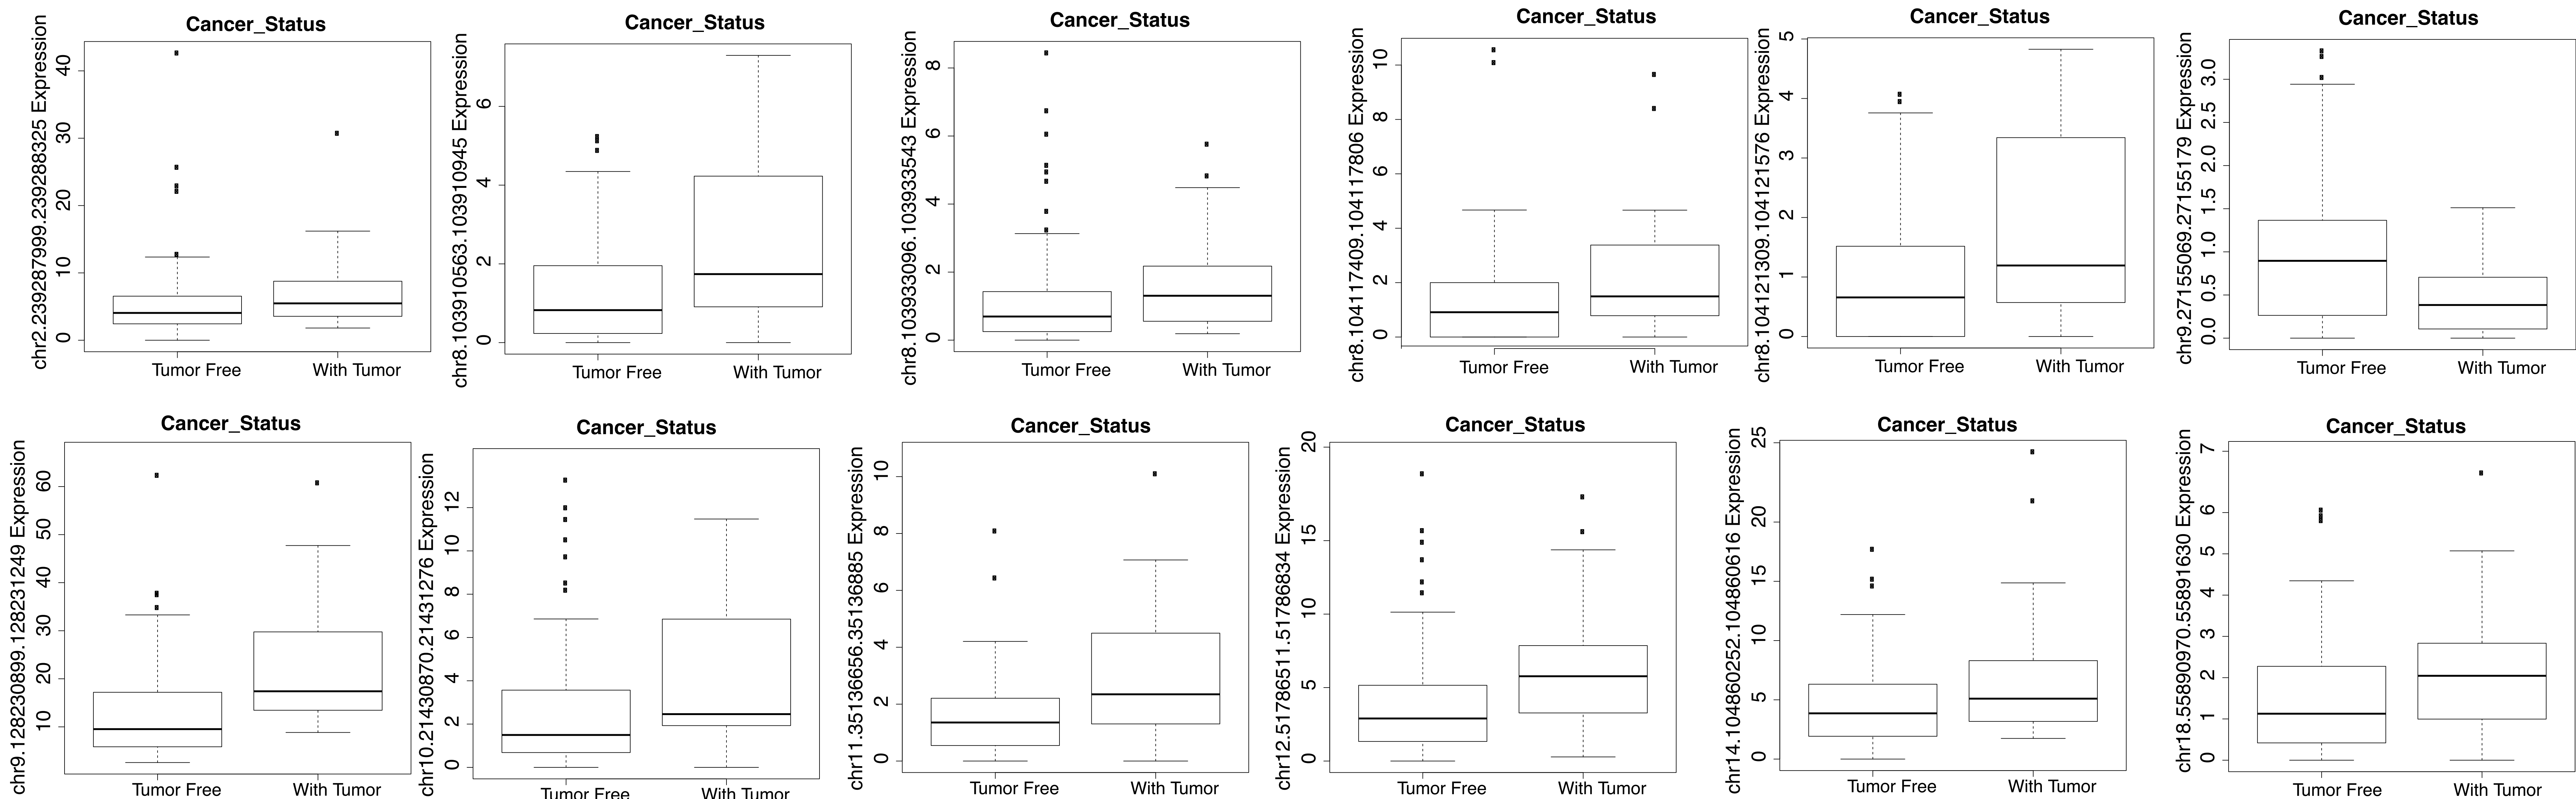

C

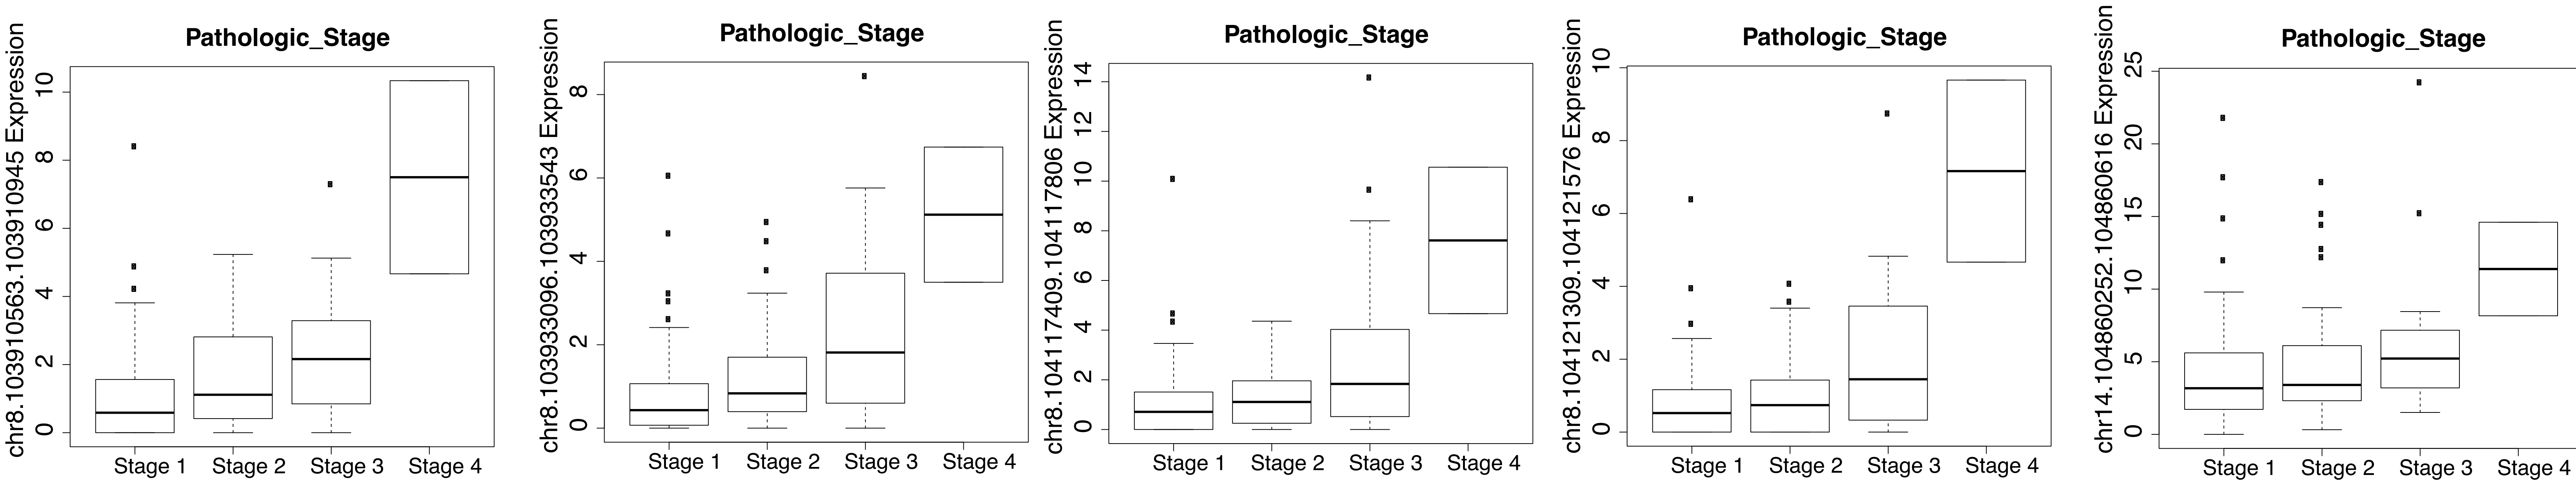

D

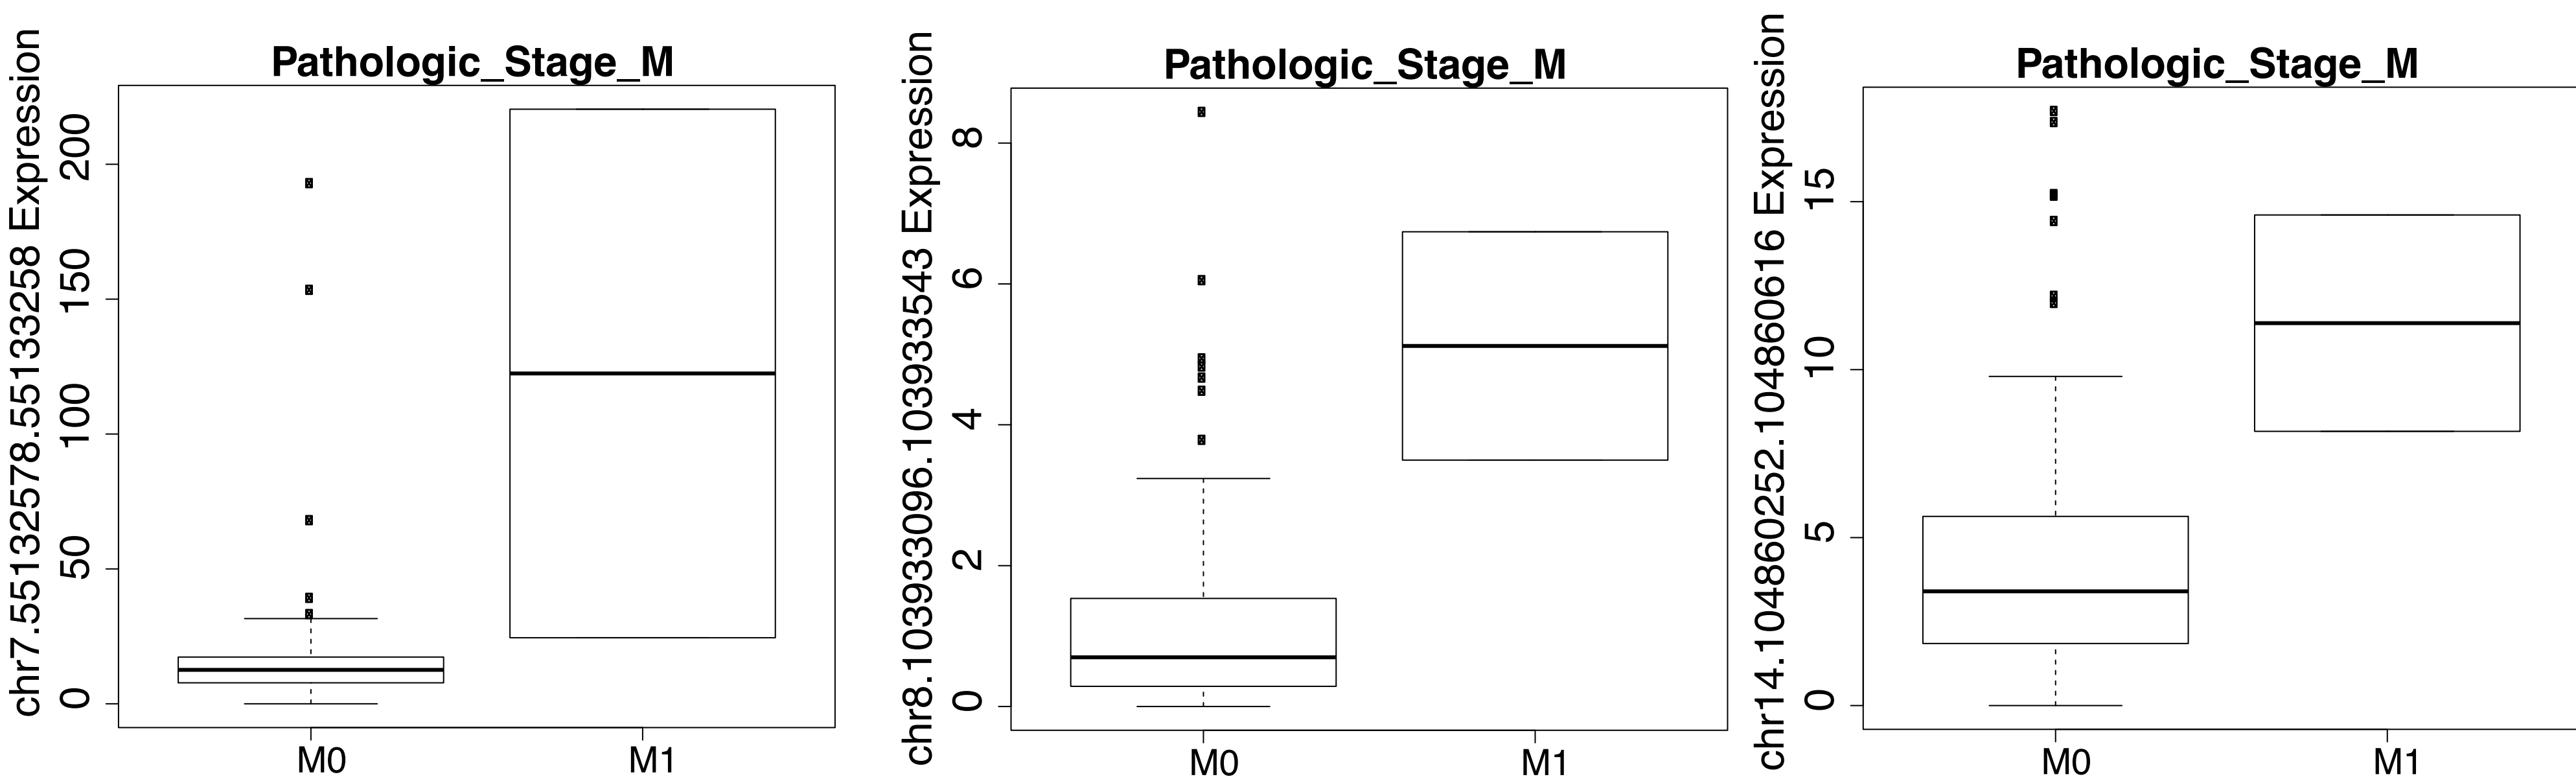

E

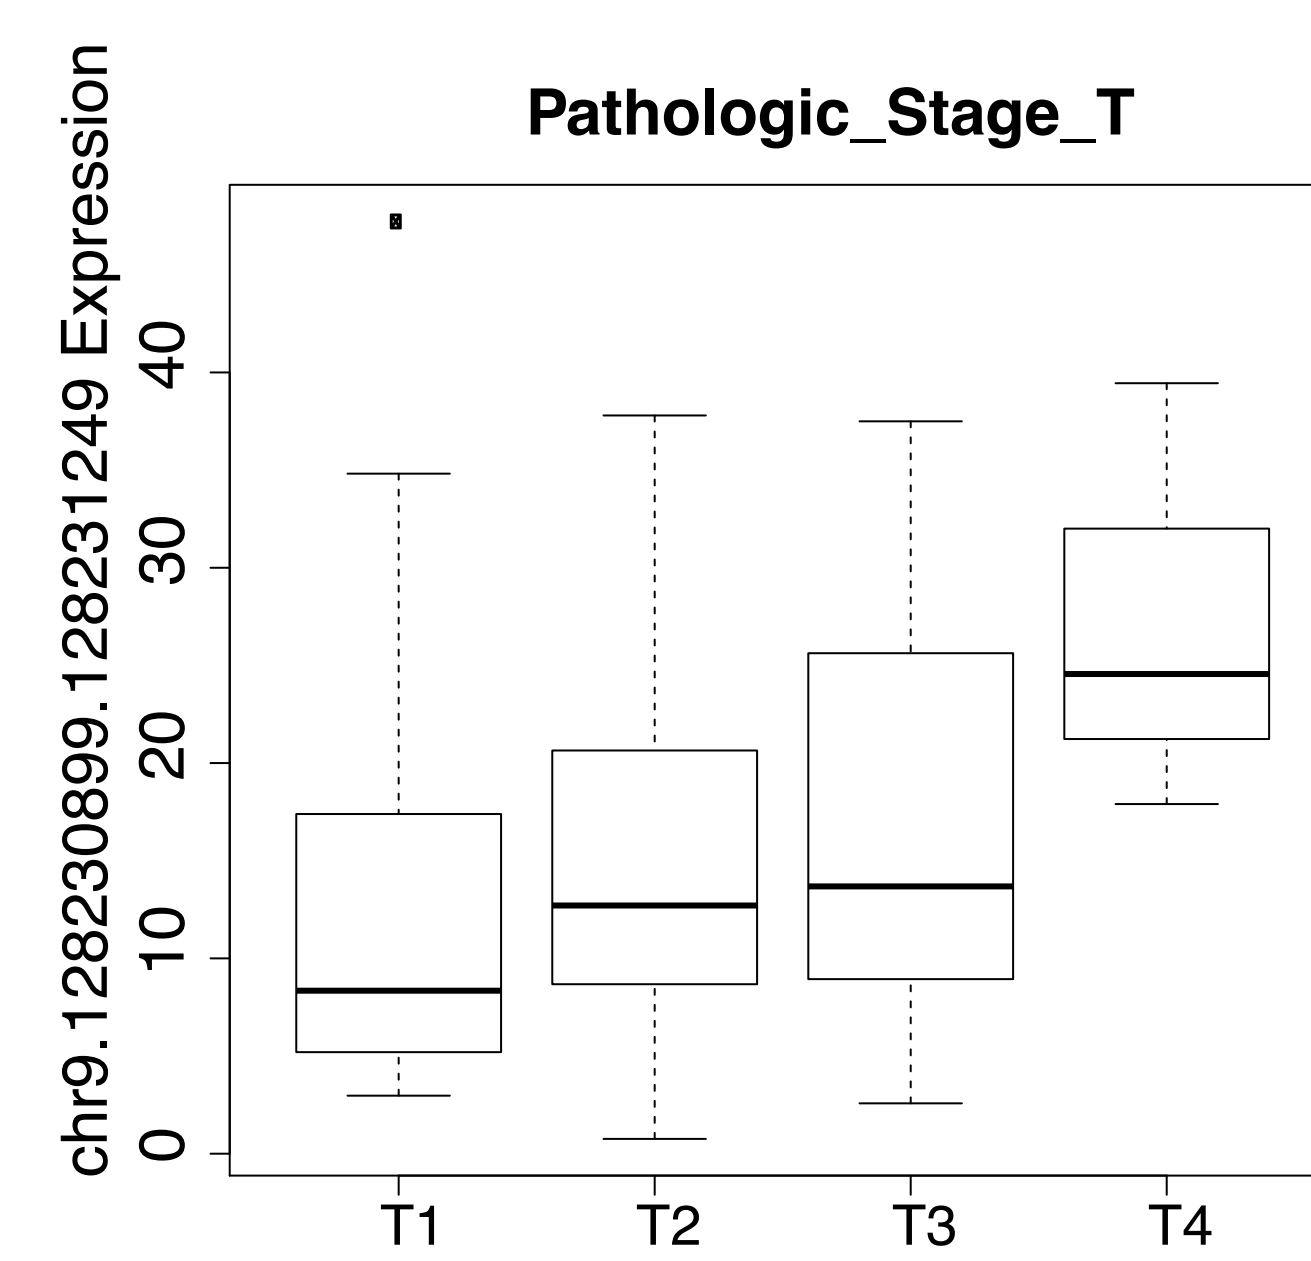

F

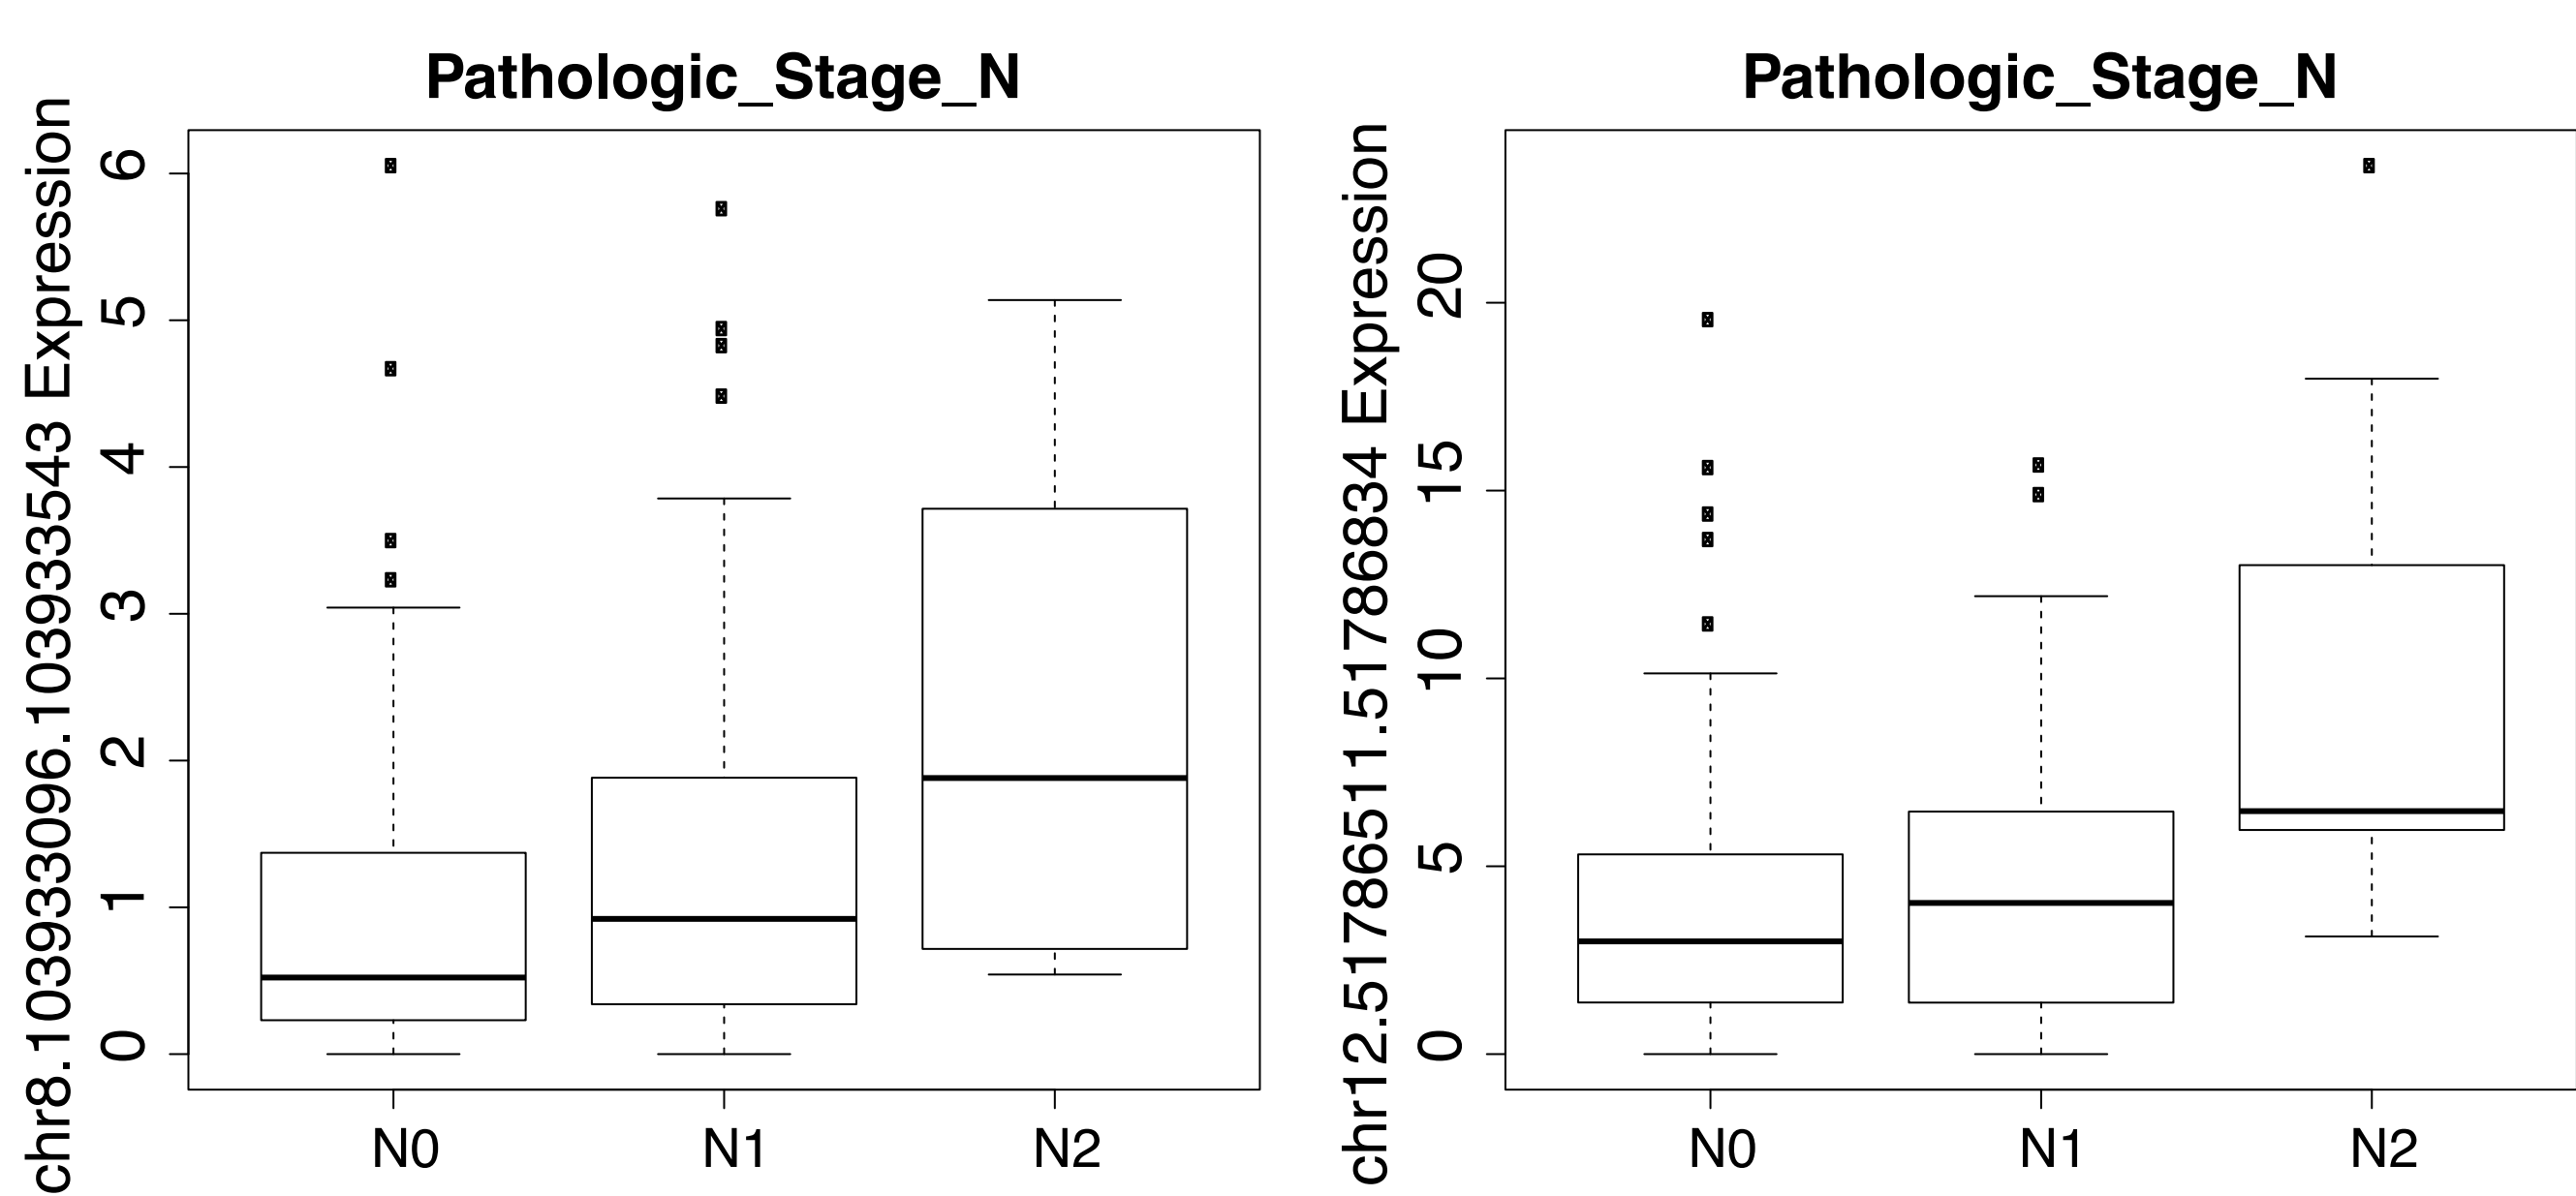

G

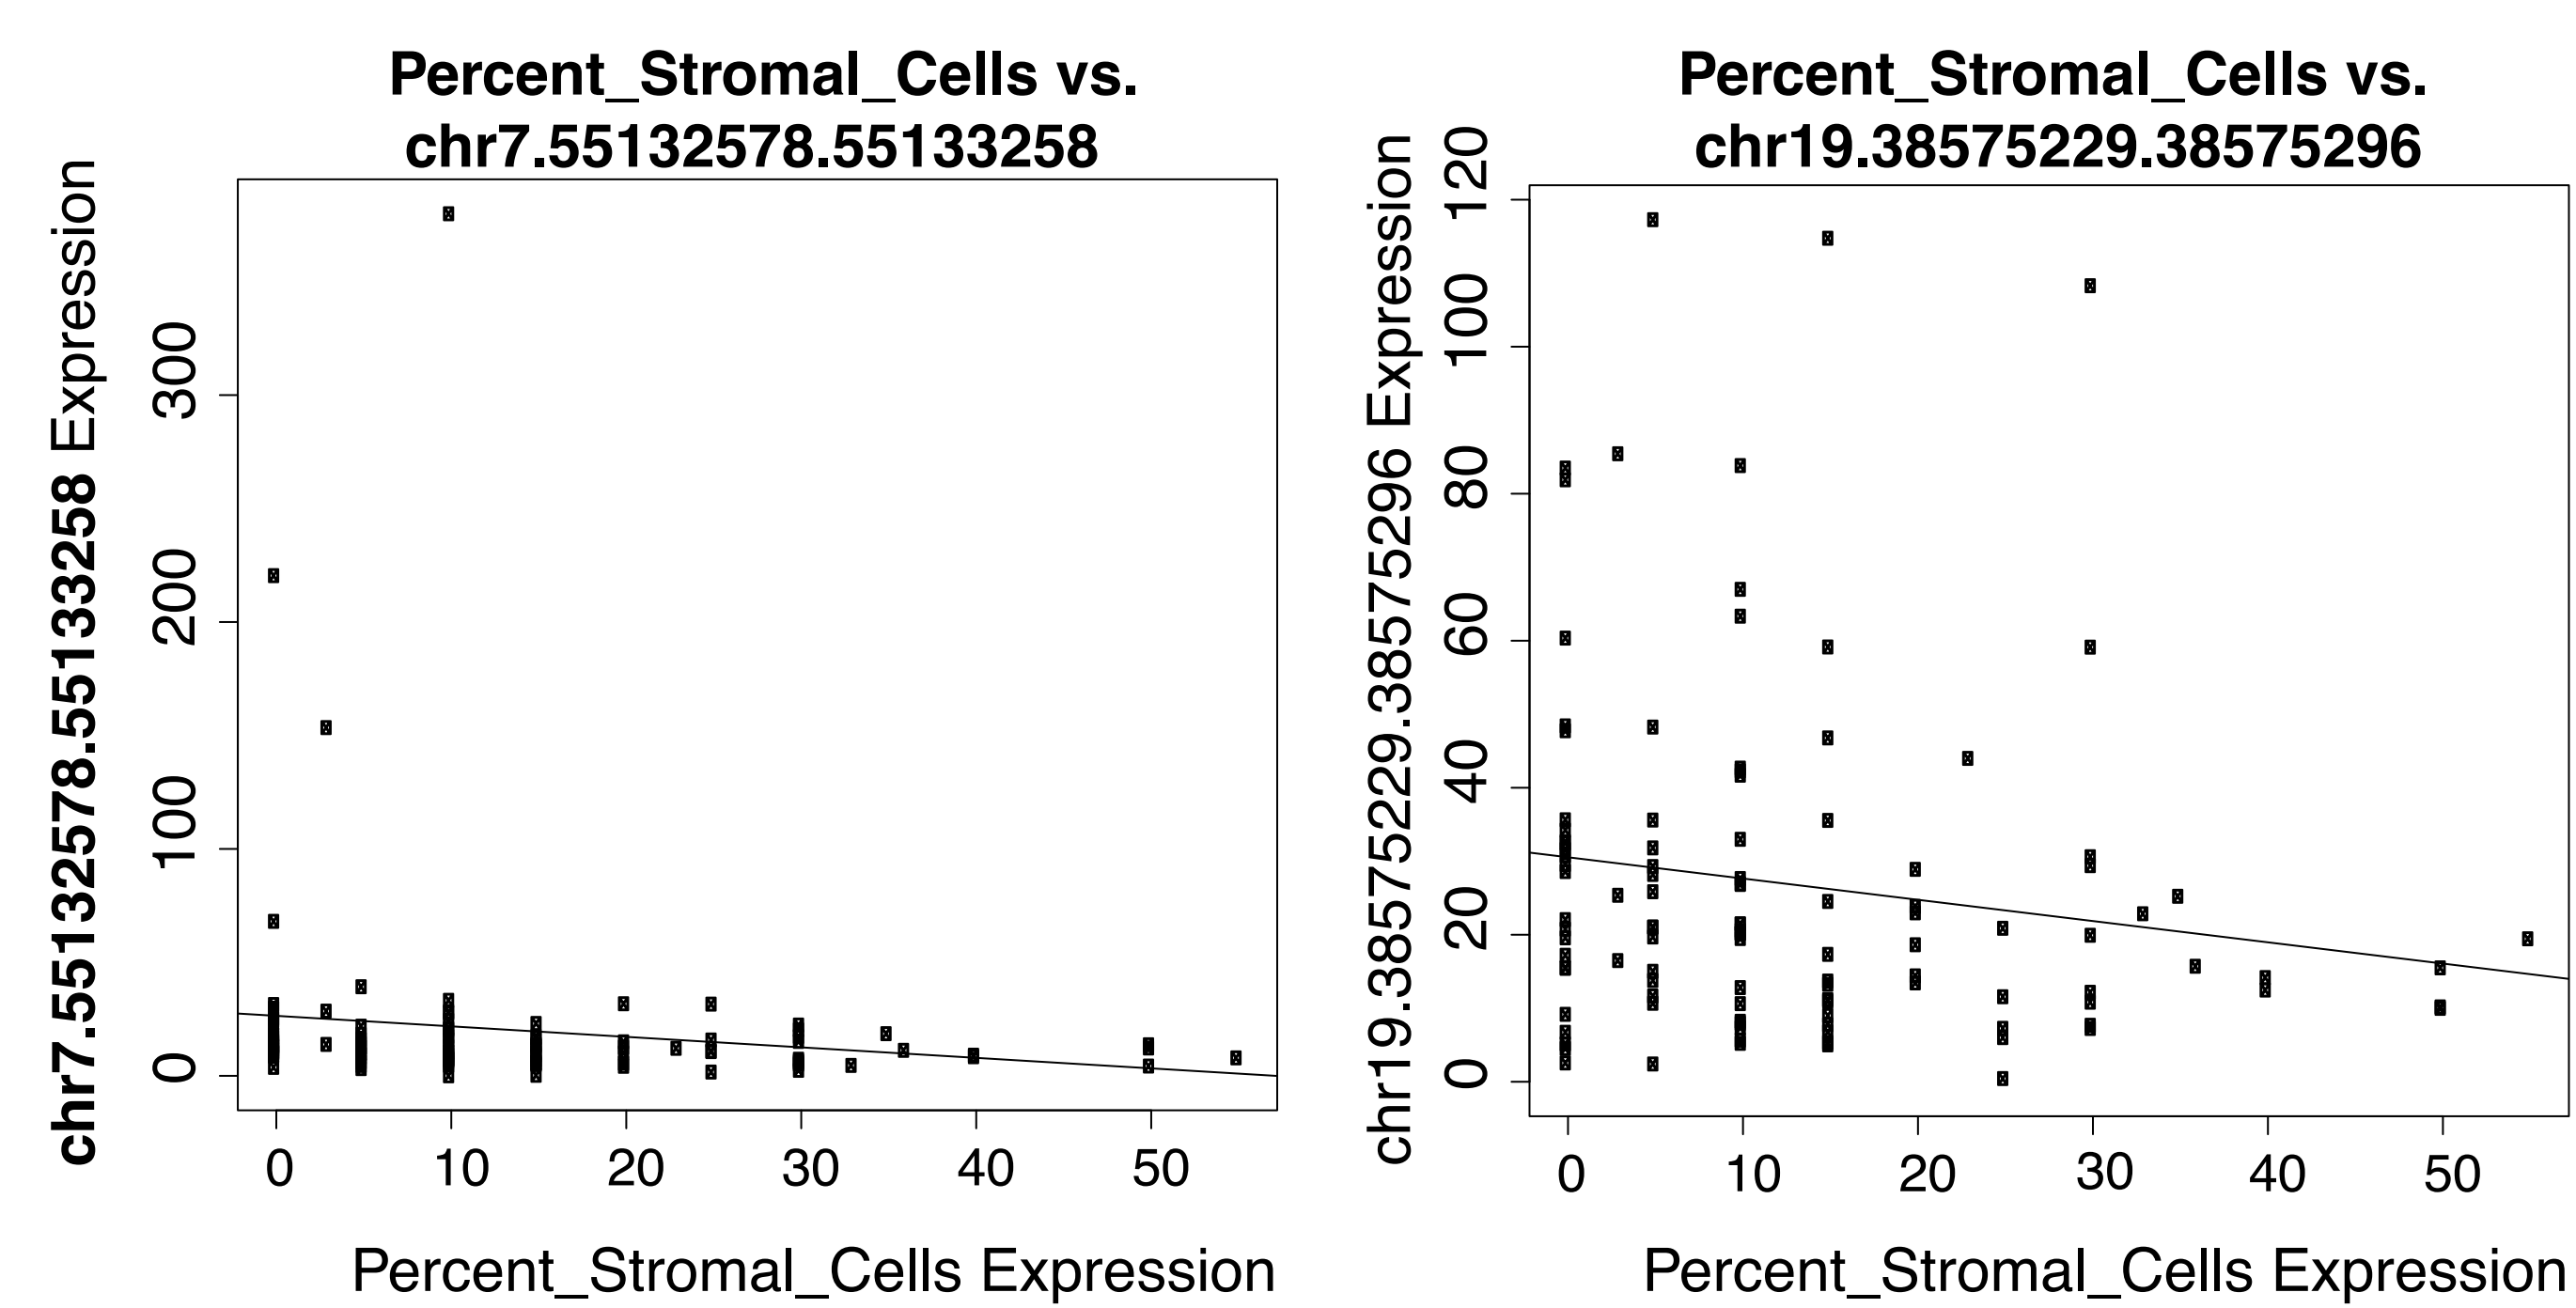

Supplement: s1 [file s1]
